# Supplementary material
Source: ML conference proceedings conference paper supplement (https://openaccess.thecvf.com/content/ICCV2025/html/Wang_Faster_and_Better_ICCV_2025_paper.html)
Supplement: Supplementary file 1 [file Wang_Faster_and_Better_ICCV_2025_supplemental.pdf]

# Faster and Better 3D Splatting via Group Training

## Supplementary Material

### A. Proof of Property 1: Opacity-based Effective Gaussians Densification

Under the assumptions of mutual independence between Gaussian attributes and intra-primitive parameter independence, the partial derivatives  $[\frac{\partial \Delta x}{\partial x_m}, \frac{\partial \Delta y}{\partial y_m}]$  for any arbitrary Gaussian admit the following derivation:

$$\frac{\partial \alpha}{\partial G} = O + \frac{\partial O}{\partial G} G = O + 0 \cdot G = O, \quad (1)$$

$$\begin{aligned} \frac{\partial L}{\partial x_m} &= \sum_{\text{pixel}} \frac{\partial L}{\partial G_m^{2D}} \frac{\partial G_m^{2D}}{\partial \Delta x} \frac{\partial \Delta x}{\partial x_m} \\ &= \sum_{\text{pixel}} o_m \frac{\partial L}{\partial \alpha_m} \frac{\partial G_m^{2D}}{\partial \Delta x} \frac{\partial \Delta x}{\partial x_m} \\ &= o_m \sum_{\text{pixel}} \frac{\partial L}{\partial \hat{C}} \frac{\partial \hat{C}}{\partial \alpha_m} \frac{\partial G_m^{2D}}{\partial \Delta x} \frac{\partial \Delta x}{\partial x_m}, \end{aligned} \quad (2)$$

$$\frac{\partial L}{\partial y_m} = o_m \sum_{\text{pixel}} \frac{\partial L}{\partial \hat{C}} \frac{\partial \hat{C}}{\partial \alpha_m} \frac{\partial G_m^{2D}}{\partial \Delta y} \frac{\partial \Delta y}{\partial y_m}, \quad (3)$$

where  $[\frac{\partial \Delta x}{\partial x_m}, \frac{\partial \Delta y}{\partial y_m}]$  remain constant parameters determined by the resolution  $[W, H]$ ;  $[\frac{\partial G_m^{2D}}{\partial \Delta x}, \frac{\partial G_m^{2D}}{\partial \Delta y}]$  derive from the scale, the rotation and the world coordinates of Gaussian primitives (independent of their opacity); and  $\frac{\partial L}{\partial \hat{C}}$  represents the loss gradient with respect to the current pixel value.

Given that  $\hat{C}$  is formulated as the composite rendering of  $N$  Gaussians in Eq. (4), the derivative  $\frac{\partial \hat{C}}{\partial \alpha_m}$  admits computation via Eq. (5).

$$\begin{aligned} \hat{C} &= \underbrace{\sum_{i=1}^{m-1} \alpha_i c_i \prod_{j=1}^{i-1} (1 - \alpha_j)}_{\text{Before Gaussian } m} + \underbrace{\alpha_m c_m \prod_{j=1}^{m-1} (1 - \alpha_j)}_{\text{Gaussian } m} \\ &+ \underbrace{\sum_{i=m+1}^N \prod_{j=1}^{m-1} (1 - \alpha_j) \alpha_i c_i (1 - \alpha_m) \prod_{j=m+1}^{i-1} (1 - \alpha_j)}_{\text{After Gaussian } m} \\ &+ \underbrace{\prod_{i=1}^N (1 - \alpha_i) c_{bg}}_{\text{background}}, \end{aligned} \quad (4)$$

$$\frac{\partial \hat{C}}{\partial \alpha_m} = \underbrace{\prod_{j=1}^{m-1} (1 - \alpha_j)}_{\text{Before } G_m} \left[ c_m - \sum_{i=m+1}^N \alpha_i c_i \prod_{j=m+1}^{i-1} (1 - \alpha_j) \right] - \frac{c_{bg} T_N}{1 - \alpha_m} \quad (5)$$

| Sampling Strategy | Tanks&Temples [6] |                 |                    |                 |                   |                   |
|-------------------|-------------------|-----------------|--------------------|-----------------|-------------------|-------------------|
|                   | PSNR $\uparrow$   | SSIM $\uparrow$ | LPIPS $\downarrow$ | PM $\downarrow$ | Size $\downarrow$ | Time $\downarrow$ |
| 3DGS*             | —                 | 23.730          | 0.8491             | 0.176           | 4.6               | 430               |
| Group Training    | Imp. score        | 23.672          | 0.8486             | <b>0.174</b>    | 5.8               | 593               |
|                   | Vol.              | 23.718          | 0.8462             | 0.182           | 5.1               | 493               |
|                   | Opac.             | <b>23.850</b>   | <b>0.8500</b>      | 0.176           | <b>4.5</b>        | <b>383</b>        |
|                   | Vol.+Opac.        | 23.684          | 0.8475             | 0.179           | 4.8               | 438               |

Table 1. **Quantitative evaluation of training efficiency on the Tanks&Temples [6] reconstructed by 3DGS [5].** \* indicates that we retrain the model. PM stands for GPU peak memory allocation, with Size in MB and Time in minutes. Imp. score = Importance score based, Vol. = Volume-based, Opac. = Opacity-based, Vol.+Opac. = Volume & Opacity-based.

| Sampling Strategy | Deep Blending [4] |                 |                    |                 |                   |                   |
|-------------------|-------------------|-----------------|--------------------|-----------------|-------------------|-------------------|
|                   | PSNR $\uparrow$   | SSIM $\uparrow$ | LPIPS $\downarrow$ | PM $\downarrow$ | Size $\downarrow$ | Time $\downarrow$ |
| 3DGS*             | —                 | 29.503          | 0.9038             | <b>0.244</b>    | 7.8               | 677               |
| Group Training    | Imp. score        | 29.589          | <b>0.9051</b>      | 0.246           | 8.5               | 765               |
|                   | Vol.              | 29.448          | 0.9036             | 0.251           | 7.5               | 623               |
|                   | Opac.             | <b>29.768</b>   | <b>0.9067</b>      | 0.245           | <b>6.8</b>        | <b>489</b>        |
|                   | Vol.+Opac.        | 29.619          | 0.9048             | 0.247           | 7.0               | 533               |

Table 2. **Quantitative evaluation of training efficiency on the Deep Blending [4] reconstructed by 3DGS [5].** Group Training with Opacity-based Prioritised Sampling demonstrates the fastest reconstruction speed and superior performance compared to other sampling strategies.

Subsequently, the mathematical expectation of this derivative is formally established through Eq. (6)

$$\begin{aligned} \mathbb{E} \left[ \frac{\partial \hat{C}}{\partial \alpha_m} \right] &= \underbrace{(1 - \alpha_0)^{m-1}}_{\text{Before } G_m} \left\{ c_0 - c_0 \alpha_0 \sum_{i=m+1}^N \mathbb{E} \left[ \underbrace{\prod_{j=m+1}^{i-1} (1 - \alpha_j)}_{\text{After } G_m} \right] \right\} - \frac{c_{bg} T_{sta.}}{1 - \alpha_0} \\ &= (1 - \alpha_0)^{m-1} \left[ c_0 - c_0 \alpha_0 \sum_{i=m+1}^N (1 - \alpha_0)^{i-m-1} \right] - \frac{c_{bg} T_{saturation}}{1 - \alpha_0} \\ &= \frac{(c_0 - c_{bg}) T_{saturation}}{1 - \alpha_0} \\ &= \frac{(c_0 - c_{bg}) T_{saturation}}{1 - \mathbb{E}[\alpha_i] \mathbb{E}[G_i]}, \end{aligned} \quad (6)$$

### B. Efficiency And Effectiveness For Various Sampling Strategies

We propose various sampling strategies for Group Training, incorporating Prioritized Sampling based on distinct sampling metrics. The sampling probability for each Gaussian primitive  $G_i$  is defined as follows:

$$p_i = \frac{\theta_i}{\sum_{i=1}^N \theta_i}, \quad (7)$$

|                    | Mip-NeRF360 [1] |                   |                   | Tanks&Temples [6] |                   |                   | Deep Blending [4] |                   |                   | Blender [8]     |                   |                   |
|--------------------|-----------------|-------------------|-------------------|-------------------|-------------------|-------------------|-------------------|-------------------|-------------------|-----------------|-------------------|-------------------|
|                    | PSNR $\uparrow$ | Time $\downarrow$ | Accel. $\uparrow$ | PSNR $\uparrow$   | Time $\downarrow$ | Accel. $\uparrow$ | PSNR $\uparrow$   | Time $\downarrow$ | Accel. $\uparrow$ | PSNR $\uparrow$ | Time $\downarrow$ | Accel. $\uparrow$ |
| 3D-GS [5]          | 27.45           | 26.7              | —                 | 23.70             | 15.0              | —                 | 29.59             | 23.9              | —                 | 33.77           | 6.1               | —                 |
| +Group Training    | 27.56           | 19.6              | 27%               | 23.85             | 11.0              | 27%               | 29.75             | 16.9              | 29%               | 33.81           | <b>4.8</b>        | 21%               |
| Mini-Splatting [3] | 27.27           | 20.7              | —                 | 23.26             | 12.6              | —                 | 29.95             | 17.8              | —                 | 31.60           | 10.0              | —                 |
| +Group Training    | 27.25           | 17.9              | 13%               | 23.10             | 9.9               | 21%               | 29.85             | 14.7              | 17%               | 31.98           | <b>8.4</b>        | 16%               |
| LightGaussian [2]  | 27.06           | 27.5              | —                 | 23.09             | 16.1              | —                 | 27.28             | 25.9              | —                 | 32.95           | 6.1               | —                 |
| +Group Training    | 27.34           | 20.5              | 25%               | 23.55             | 11.9              | 26%               | 28.50             | 19.0              | 27%               | 33.18           | <b>4.6</b>        | 24%               |

Table 3. **Quantitative comparisons on different baselines and datasets.** Group Training with 3DGS achieves faster reconstruction speed than Mini-Splatting across all datasets. Furthermore, Group Training demonstrates **consistent acceleration effects** on both 3DGS acceleration model (13%~21% speedup on Mini-Splatting [3]) and compression model (24%~27% speedup on LightGaussian [2]). Accel. = Acceleration Ratio in training time compared to the baseline.

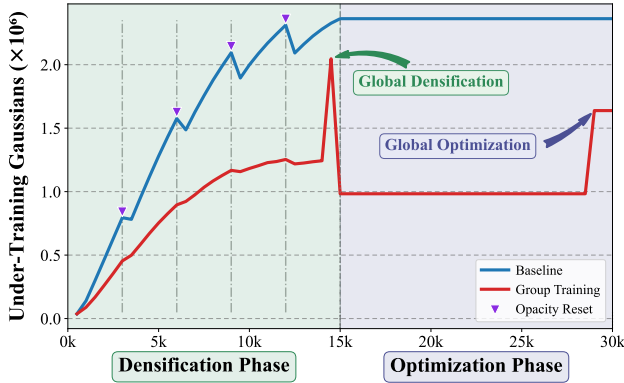

Figure 1. **Comparison of Under-Training Gaussian Primitives.** Our Group-Training methodology selectively trains a subset of Gaussian primitives, demonstrating enhanced computational efficiency while mitigating loss of potentially critical points during opacity reset operations.

where  $\theta_i$  represents the sampling metrics (opacity [2], volume [7] or importance score<sup>1</sup> [3, 9, 11]) of Gaussian primitive  $G_i$ , and  $N$  is the total number of Gaussian primitives. We also evaluated the metric which both Opacity and Volume are considered simultaneously, referred to as the Volume & Opacity-based method, as applied in [2]. The sampling metric  $\theta_i$  for Volume & Opacity-based Prioritized Sampling is computed as follows:

$$\theta_i = \alpha_i \cdot V_i, \quad (8)$$

where  $\alpha_i$  represents the opacity and  $V_i$  represents the volume of Gaussian primitive  $G_i$ .

We conducted experiments using 3D Gaussian Splatting (3DGS) on two datasets: Tanks&Temples [6] and Deep Blending [4], both captured with camera-based systems. The comprehensive comparative results are presented in Tab. 1 and Tab. 2. Our results demonstrate that Group

<sup>1</sup>Based on code: <https://github.com/fatPeter/mini-splatting.git>

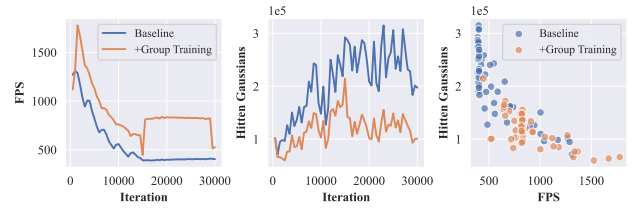

Figure 2. **Comparison of Forward Rendering Efficiency.** We measured the number of hit Gaussians and forward rendering FPS throughout the training process. 3DGS with Group Training consistently demonstrated higher FPS and fewer hit Gaussians compared to the baseline method during training.

Training with Opacity-based Prioritized Sampling (OPS) consistently achieves significant improvements in both reconstruction speed and the quality of 3DGS models. Additionally, the reconstructed models exhibit greater compactness, as evidenced by a marked reduction in redundant Gaussian primitives.

However, volume and importance scores are not the most effective sampling metrics, as they fail to differentiate Gaussians that contribute to densification. This deficiency leads to abrupt vacancies in the Gaussian space under high sampling rates, causing the over-reconstruction and under-reconstruction [5]. Consequently, this exacerbates Gaussian densification, introducing redundancy between newly densified Gaussians and those already cached. The detailed analysis is provided in Sec. 3.2.

### C. Temporal Evolution of Under-Training Gaussian Primitives

We visually compare the quantitative differences in under-training Gaussian primitives between Group-Training and 3DGS during scene reconstruction in Fig. 1. 3DGS with Group-Training reduces the training overhead by avoiding full optimization of all Gaussian primitives. Furthermore, during each opacity reset operation, the proposed

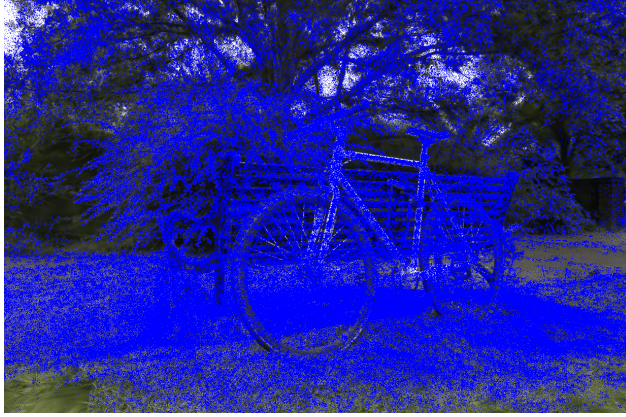

(a) 3DGS (PSNR: 25.21dB Time: 34.1min)

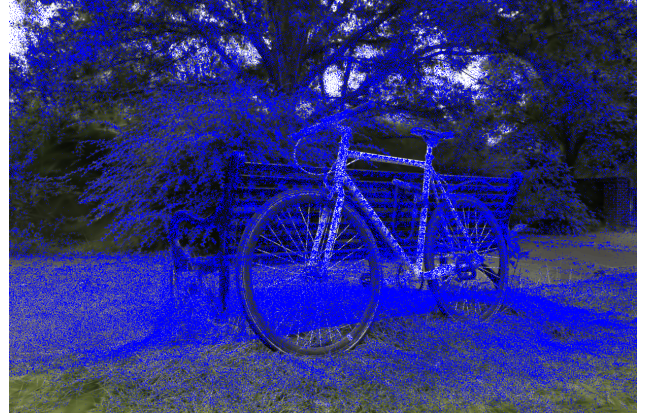

(b) 3DGS + Group Training (PSNR: 25.22dB Time: 21.8min)

Figure 3. **The visual comparison of Gaussian primitive distributions in the imaging plane.** We visualize the Gaussian projection information on the imaging plane during images rendering. **Left:** Gaussian distribution on the imaging plane for the "Bicycle" scene [1]. **Right:** 3DGS with Group Training achieves comparable rendering quality using fewer Gaussian primitives.

method retains a higher proportion of geometrically significant primitives compared to baseline. These retained elements, despite their low-opacity values, preserve critical structural information that contributes to scene geometry fidelity.

#### D. Comparison of Scene Representation Efficiency

Comparative analysis of per-iteration FPS and hit Gaussian counts was conducted during 3DGS reconstruction of the 'train' scene under baseline conditions and Group Training. Experimental results show the baseline method required 12.5 minutes to reach a PSNR of 21.985 dB, whereas Group Training with OPS acceleration attained a PSNR of 22.156 dB in just 9.3 minutes. These measurements confirm that Group Training consistently delivers accelerated rendering frame rates alongside a substantial reduction in hidden Gaussians count during training. Consequently, Group Training demonstrates higher scene representation efficiency, utilizing significantly fewer Gaussian primitives without compromising reconstruction quality.

#### E. Distribution of Gaussian Primitives in Imaging Plane Space

Fig. 3 illustrates the projection of rendering Gaussian primitives onto the imaging plane. Our Group Training approach significantly reduces the number of primitives required per image compared to the baseline, without compromising rendering quality, and further improves reconstruction speed.

#### F. Methodological Applicability

We perform comparative validation across two distinct 3DGS architectures: an acceleration-optimized model [3] and a compression-focused LightGaussian [2].

Empirical results demonstrate Group-Training's consistent efficacy across dataset scales, particularly evidenced by reduced temporal overhead in the Blender [8], as shown in Tab. 3. Crucially, our method synergistically integrates with existing acceleration techniques like Mini-Splatting [3], achieving compounded acceleration gains while providing sustained acceleration for compressed models with concurrent fidelity enhancement.

#### G. Detailed Experimental Results for All Scenes

We present the reconstruction results for all scenes using Group Training with Random Sampling (RS) and Opacity-based Prioritized Sampling (OPS), evaluated on 3D Gaussian Splatting (3DGS) [5] and Mip-Splatting [10]. The detailed results are provided in Tabs. 4 to 11.

The experimental results demonstrate that Group Training consistently delivers significant improvements in both reconstruction speed and quality across all tests, with the acceleration effect being particularly pronounced on complex datasets. Notably, Group Training with OPS achieves the fastest reconstruction times while maintaining optimal or near-optimal reconstruction quality.

We compare the effects of enabling RS and OPS during the Gaussian densification phase. The results indicate that Group Training with RS generates a significantly larger number of Gaussian primitives across all scenarios. For example, when reconstructing the "Bicycle" scene using Mip-Splatting, the high density of Gaussian primitives required

the use of an NVIDIA A100 GPU for Group Training with RS. In contrast, Group Training with OPS produces sparser Gaussian primitives while delivering comparable or even superior reconstruction quality. Additionally, the reduced number of Gaussian primitives significantly alleviates the burden on peak memory usage.

## References

- [1] Jonathan T. Barron. Mip-NeRF 360: Unbounded Anti-Aliased Neural Radiance Fields. In *CVPR*, 2022. [2](#), [3](#), [5](#), [7](#)
- [2] Zhiwen Fan, Kevin Wang, Kairun Wen, Zehao Zhu, De-jia Xu, and Zhangyang Wang. Lightgaussian: Unbounded 3d gaussian compression with 15x reduction and 200+ fps, 2023. [2](#), [3](#)
- [3] Guangchi Fang and Bing Wang. Mini-splatting: Representing scenes with a constrained number of gaussians, 2024. [2](#), [3](#)
- [4] Peter Hedman, Julien Philip, True Price, Jan-Michael Frahm, George Drettakis, and Gabriel Brostow. Deep Blending for Free-Viewpoint Image-Based Rendering. In *SIGGRAPH*, 2018. [1](#), [2](#), [5](#), [7](#)
- [5] Bernhard Kerbl, Georgios Kopanas, Thomas Leimkühler, and George Drettakis. 3d gaussian splatting for real-time radiance field rendering. *ACM Transactions on Graphics*, 42(4), 2023. [1](#), [2](#), [3](#), [5](#), [6](#)
- [6] Arno Knapitsch, Jaesik Park, Qian-Yi Zhou, and Vladlen Koltun. Tanks and Temples: Benchmarking Large-Scale Scene Reconstruction. In *SIGGRAPH*, 2017. [1](#), [2](#), [6](#), [8](#)
- [7] Yang Liu, Chuanchen Luo, Lue Fan, Naiyan Wang, Junran Peng, and Zhaoxiang Zhang. Citygaussian: Real-time high-quality large-scale scene rendering with gaussians. In *European Conference on Computer Vision*, pages 265–282. Springer, 2025. [2](#)
- [8] Ben Mildenhall, Pratul P. Srinivasan, Matthew Tancik, Jonathan T. Barron, Ravi Ramamoorthi, and Ren Ng. Nerf: Representing scenes as neural radiance fields for view synthesis. In *ECCV*, 2020. [2](#), [3](#), [6](#), [8](#)
- [9] Michael Niemeyer, Fabian Manhardt, Marie-Julie Rakotsaona, Michael Oechsle, Daniel Duckworth, Rama Gosula, Keisuke Tateno, John Bates, Dominik Kaeser, and Federico Tombari. Radsplat: Radiance field-informed gaussian splatting for robust real-time rendering with 900+ fps. *arXiv.org*, 2024. [2](#)
- [10] Zehao Yu, Anpei Chen, Binbin Huang, Torsten Sattler, and Andreas Geiger. Mip-splatting: Alias-free 3d gaussian splatting. In *CVPR*, 2024. [3](#), [7](#), [8](#)
- [11] Zhaoliang Zhang, Tianchen Song, Yongjae Lee, Li Yang, Cheng Peng, Rama Chellappa, and Deliang Fan. Lp-3dgs: Learning to prune 3d gaussian splatting. *arXiv preprint arXiv:2405.18784*, 2024. [2](#)



|                           | Grouping<br>Iterations | Dr. Johnson     |                 |                    |                 |                   |                   | Playroom        |                 |                    |                 |                   |                   |
|---------------------------|------------------------|-----------------|-----------------|--------------------|-----------------|-------------------|-------------------|-----------------|-----------------|--------------------|-----------------|-------------------|-------------------|
|                           |                        | PSNR $\uparrow$ | SSIM $\uparrow$ | LPIPS $\downarrow$ | PM $\downarrow$ | Size $\downarrow$ | Time $\downarrow$ | PSNR $\uparrow$ | SSIM $\uparrow$ | LPIPS $\downarrow$ | PM $\downarrow$ | Size $\downarrow$ | Time $\downarrow$ |
| 3D Gaussian Splatting [5] | –                      | 28.766          | 0.899           | 0.244              | –               | –                 | –                 | 30.044          | 0.906           | 0.241              | –               | –                 | –                 |
| 3D Gaussian Splatting*    | –                      | 29.190          | 0.901           | 0.2442             | 9.0             | 782               | 26.8              | 29.981          | 0.907           | 0.2431             | 6.4             | 549               | 21.0              |
| Group Training w/ RS      | 0~15K                  | 28.383          | 0.894           | 0.2517             | 8.8             | 733               | 24.2              | 29.987          | 0.908           | 0.2429             | 6.5             | 554               | 19.5              |
|                           | 0~30K                  | 28.701          | 0.902           | 0.2513             | 8.8             | 734               | 20.3              | 30.133          | 0.912           | 0.2448             | 6.5             | 552               | 16.6              |
| Group Training w/ OPS     | 0~15K                  | 29.287          | 0.903           | 0.2430             | 8.1             | 592               | 21.7              | 30.138          | 0.909           | 0.2439             | 5.6             | 382               | 16.8              |
|                           | 0~30K                  | 29.309          | 0.904           | 0.2451             | 8.1             | 594               | 18.6              | 30.183          | 0.910           | 0.2448             | 5.6             | 380               | 15.1              |

Table 4. **Comprehensive quantitative evaluation results on the DeepBlending [4] reconstructed by 3DGS [5].** RS denotes Random Sampling, and OPS denotes Opacity-based Prioritized Sampling.

|       | Grouping<br>Iterations | Mip-NeRF360 [1] |         |        |        |          |        |         |         |        |        |
|-------|------------------------|-----------------|---------|--------|--------|----------|--------|---------|---------|--------|--------|
|       |                        | bicycle         | flowers | garden | stump  | treehill | bonsai | counter | kitchen | room   |        |
| PSNR  | 3DGS [5]               | –               | 25.246  | 21.520 | 27.410 | 26.550   | 22.490 | 31.980  | 28.700  | 31.317 | 30.632 |
|       | 3DGS*                  | –               | 25.205  | 21.484 | 27.397 | 26.620   | 22.514 | 32.202  | 28.980  | 31.222 | 31.377 |
|       | Group Training w/ RS   | 0~15K           | 25.228  | 21.748 | 27.552 | 26.854   | 22.441 | 32.430  | 29.121  | 31.579 | 31.634 |
|       |                        | 0~30K           | 25.217  | 21.806 | 27.463 | 27.095   | 22.671 | 31.975  | 28.850  | 31.319 | 31.438 |
|       | Group Training w/ OPS  | 0~15K           | 25.260  | 21.751 | 27.434 | 26.809   | 22.402 | 32.312  | 29.031  | 31.539 | 31.699 |
|       |                        | 0~30K           | 25.219  | 21.741 | 27.418 | 26.830   | 22.522 | 32.205  | 28.973  | 31.425 | 31.744 |
| SSIM  | 3DGS [5]               | –               | 0.771   | 0.605  | 0.868  | 0.775    | 0.638  | 0.938   | 0.905   | 0.922  | 0.914  |
|       | 3DGS*                  | –               | 0.765   | 0.605  | 0.866  | 0.773    | 0.634  | 0.942   | 0.908   | 0.927  | 0.919  |
|       | Group Training w/ RS   | 0~15K           | 0.769   | 0.619  | 0.872  | 0.787    | 0.638  | 0.946   | 0.913   | 0.930  | 0.923  |
|       |                        | 0~30K           | 0.769   | 0.616  | 0.871  | 0.795    | 0.642  | 0.942   | 0.909   | 0.927  | 0.920  |
|       | Group Training w/ OPS  | 0~15K           | 0.770   | 0.617  | 0.869  | 0.785    | 0.635  | 0.945   | 0.911   | 0.929  | 0.922  |
|       |                        | 0~30K           | 0.768   | 0.616  | 0.868  | 0.786    | 0.637  | 0.944   | 0.909   | 0.927  | 0.921  |
| LPIPS | 3DGS [5]               | –               | 0.205   | 0.336  | 0.103  | 0.210    | 0.317  | 0.205   | 0.204   | 0.129  | 0.220  |
|       | 3DGS*                  | –               | 0.2103  | 0.3355 | 0.1069 | 0.2149   | 0.3240 | 0.2036  | 0.2001  | 0.1261 | 0.2184 |
|       | Group Training w/ RS   | 0~15K           | 0.2094  | 0.3246 | 0.0985 | 0.1989   | 0.3182 | 0.1936  | 0.1909  | 0.1216 | 0.2110 |
|       |                        | 0~30K           | 0.2225  | 0.3324 | 0.1061 | 0.2032   | 0.3281 | 0.2008  | 0.2008  | 0.1280 | 0.2198 |
|       | Group Training w/ OPS  | 0~15K           | 0.2074  | 0.3262 | 0.1033 | 0.2044   | 0.3203 | 0.1968  | 0.1954  | 0.1245 | 0.2148 |
|       |                        | 0~30K           | 0.2125  | 0.3307 | 0.1051 | 0.2075   | 0.3226 | 0.1992  | 0.1987  | 0.1272 | 0.2161 |
| PM    | 3DGS*                  | –               | 11.6    | 7.7    | 11.3   | 9.0      | 7.5    | 7.7     | 6.7     | 8.4    | 8.5    |
|       | Group Training w/ RS   | 0~15K           | 12.1    | 8.8    | 12.0   | 10.9     | 9.0    | 8.4     | 7.1     | 8.5    | 8.8    |
|       |                        | 0~30K           | 12.0    | 8.8    | 12.0   | 10.9     | 9.0    | 8.4     | 7.2     | 8.5    | 8.7    |
|       | Group Training w/ OPS  | 0~15K           | 11.1    | 8.1    | 10.6   | 9.4      | 8.2    | 7.6     | 6.4     | 7.6    | 8.1    |
| Size  | Group Training w/ RS   | 0~30K           | 11.1    | 8.0    | 10.6   | 9.3      | 8.4    | 7.6     | 6.4     | 7.6    | 8.1    |
|       |                        | 0~30K           | 11.1    | 8.0    | 10.6   | 9.3      | 8.4    | 7.6     | 6.4     | 7.6    | 8.1    |
|       | Group Training w/ OPS  | 0~15K           | 1192    | 795    | 1083   | 1078     | 899    | 267     | 225     | 277    | 287    |
|       |                        | 0~30K           | 1195    | 790    | 1084   | 1060     | 921    | 267     | 225     | 275    | 291    |
| Time  | 3DGS*                  | –               | 34.1    | 24.0   | 35.9   | 27.2     | 24.0   | 20.5    | 22.8    | 28.3   | 23.7   |
|       | Group Training w/ RS   | 0~15K           | 31.2    | 24.2   | 33.2   | 28.7     | 25.0   | 22.1    | 24.3    | 27.6   | 23.3   |
|       |                        | 0~30K           | 24.8    | 20.1   | 27.3   | 23.6     | 20.3   | 20.6    | 21.7    | 24.2   | 20.6   |
|       | Group Training w/ OPS  | 0~15K           | 26.9    | 21.1   | 27.4   | 23.5     | 22.0   | 18.5    | 20.4    | 22.4   | 20.6   |
|       |                        | 0~30K           | 21.8    | 17.9   | 23.2   | 19.4     | 18.4   | 17.4    | 18.7    | 20.4   | 18.8   |

Table 5. **Comprehensive quantitative evaluation results on the Mip-NeRF360 [1] reconstructed by 3DGS [5].**

|                           | Grouping<br>Iterations | Train           |                 |                    |                 |                   |                   | Truck           |                 |                    |                 |                   |                   |
|---------------------------|------------------------|-----------------|-----------------|--------------------|-----------------|-------------------|-------------------|-----------------|-----------------|--------------------|-----------------|-------------------|-------------------|
|                           |                        | PSNR $\uparrow$ | SSIM $\uparrow$ | LPIPS $\downarrow$ | PM $\downarrow$ | Size $\downarrow$ | Time $\downarrow$ | PSNR $\uparrow$ | SSIM $\uparrow$ | LPIPS $\downarrow$ | PM $\downarrow$ | Size $\downarrow$ | Time $\downarrow$ |
| 3D Gaussian Splatting [5] | –                      | 21.097          | 0.802           | 0.218              | –               | –                 | –                 | 25.187          | 0.879           | 0.148              | –               | –                 | –                 |
| 3D Gaussian Splatting*    | –                      | 21.985          | 0.815           | 0.2063             | 3.6             | 257               | 12.5              | 25.409          | 0.882           | 0.1464             | 5.5             | 610               | 17.5              |
| Group Training w/ RS      | 0~15K                  | 22.064          | 0.818           | 0.2031             | 3.9             | 278               | 11.7              | 25.482          | 0.885           | 0.1375             | 6.3             | 714               | 17.5              |
|                           | 0~30K                  | 21.910          | 0.812           | 0.2185             | 3.8             | 273               | 10.1              | 25.495          | 0.884           | 0.1460             | 6.3             | 716               | 14.4              |
| Group Training w/ OPS     | 0~15K                  | 22.159          | 0.818           | 0.2040             | 3.6             | 228               | 10.7              | 25.524          | 0.884           | 0.1411             | 5.5             | 539               | 14.9              |
|                           | 0~30K                  | 22.156          | 0.816           | 0.2104             | 3.6             | 227               | 9.3               | 25.549          | 0.884           | 0.1424             | 5.5             | 540               | 12.6              |

Table 6. Comprehensive quantitative evaluation results on the Tanks&Temples [6] reconstructed by 3DGS [5].

|                       |                       | Grouping<br>Iterations | Blender [8] |        |        |        |        |           |        |        |
|-----------------------|-----------------------|------------------------|-------------|--------|--------|--------|--------|-----------|--------|--------|
|                       |                       |                        | chair       | drumps | ficus  | hotdog | lego   | materials | mic    | ship   |
| PSNR                  | 3DGS [5]              | –                      | 33.83       | 26.15  | 34.87  | 37.72  | 35.78  | 30.00     | 35.36  | 30.80  |
|                       | 3DGS*                 | –                      | 35.581      | 26.258 | 35.481 | 38.004 | 36.062 | 30.461    | 36.649 | 31.677 |
|                       | Group Training w/ RS  | 0~15K                  | 35.736      | 26.273 | 35.494 | 38.242 | 36.580 | 30.675    | 36.842 | 31.829 |
|                       |                       | 0~30K                  | 35.637      | 26.224 | 35.436 | 38.142 | 36.441 | 30.588    | 36.786 | 31.765 |
|                       | Group Training w/ OPS | 0~15K                  | 35.688      | 26.270 | 35.487 | 38.145 | 36.435 | 30.569    | 36.719 | 31.800 |
|                       |                       | 0~30K                  | 35.623      | 26.227 | 35.467 | 38.017 | 36.335 | 30.452    | 36.654 | 31.692 |
| SSIM                  | 3DGS*                 | –                      | 0.988       | 0.955  | 0.987  | 0.985  | 0.983  | 0.960     | 0.993  | 0.906  |
|                       | Group Training w/ RS  | 0~15K                  | 0.988       | 0.955  | 0.987  | 0.986  | 0.985  | 0.962     | 0.993  | 0.909  |
|                       |                       | 0~30K                  | 0.988       | 0.956  | 0.987  | 0.987  | 0.985  | 0.963     | 0.993  | 0.910  |
|                       | Group Training w/ OPS | 0~15K                  | 0.988       | 0.955  | 0.987  | 0.986  | 0.984  | 0.962     | 0.993  | 0.909  |
|                       |                       | 0~30K                  | 0.988       | 0.955  | 0.987  | 0.986  | 0.984  | 0.961     | 0.992  | 0.909  |
|                       | LPIPS                 | 3DGS*                  | –           | 0.0104 | 0.0367 | 0.0118 | 0.0201 | 0.0161    | 0.0370 | 0.0064 |
| Group Training w/ RS  |                       | 0~15K                  | 0.0097      | 0.0355 | 0.0117 | 0.0170 | 0.0131 | 0.0340    | 0.0061 | 0.0998 |
|                       |                       | 0~30K                  | 0.0107      | 0.0357 | 0.0118 | 0.0184 | 0.0140 | 0.0351    | 0.0063 | 0.1037 |
| Group Training w/ OPS |                       | 0~15K                  | 0.0099      | 0.0359 | 0.0118 | 0.0181 | 0.0139 | 0.0356    | 0.0064 | 0.1016 |
|                       |                       | 0~30K                  | 0.0102      | 0.0364 | 0.0119 | 0.0189 | 0.0143 | 0.0367    | 0.0065 | 0.1042 |
| PM                    |                       | 3DGS*                  | –           | 3.1    | 2.9    | 2.7    | 2.6    | 2.9       | 2.6    | 2.6    |
|                       | Group Training w/ RS  | 0~15K                  | 2.9         | 2.8    | 2.6    | 2.7    | 3.0    | 2.6       | 2.6    | 2.8    |
|                       |                       | 0~30K                  | 2.9         | 2.8    | 2.6    | 2.7    | 3.0    | 2.6       | 2.6    | 2.8    |
|                       | Group Training w/ OPS | 0~15K                  | 2.8         | 2.7    | 2.5    | 2.6    | 2.8    | 2.6       | 2.6    | 2.7    |
|                       |                       | 0~30K                  | 2.8         | 2.7    | 2.5    | 2.6    | 2.8    | 2.5       | 2.6    | 2.7    |
|                       | Size                  | 3DGS*                  | –           | 116    | 92     | 63     | 44     | 82        | 39     | 46     |
| Group Training w/ RS  |                       | 0~15K                  | 88          | 78     | 39     | 46     | 97     | 47        | 42     | 69     |
|                       |                       | 0~30K                  | 87          | 78     | 39     | 47     | 97     | 47        | 43     | 69     |
| Group Training w/ OPS |                       | 0~15K                  | 59          | 57     | 27     | 31     | 58     | 32        | 30     | 49     |
|                       |                       | 0~30K                  | 61          | 58     | 27     | 31     | 58     | 30        | 30     | 49     |
| Time                  |                       | 3DGS*                  | –           | 7.4    | 6.6    | 5.3    | 5.9    | 6.5       | 4.9    | 5.3    |
|                       | Group Training w/ RS  | 0~15K                  | 6.0         | 5.7    | 4.5    | 6.0    | 6.4    | 5.2       | 4.8    | 6.7    |
|                       |                       | 0~30K                  | 5.5         | 5.3    | 4.3    | 5.5    | 5.8    | 4.9       | 4.6    | 6.2    |
|                       | Group Training w/ OPS | 0~15K                  | 5.3         | 5.3    | 4.1    | 5.2    | 5.3    | 4.6       | 4.5    | 5.8    |
|                       |                       | 0~30K                  | 5.1         | 5.0    | 4.0    | 5.0    | 5.0    | 4.5       | 4.2    | 5.5    |

Table 7. Comprehensive quantitative evaluation results on the Blender [8] reconstructed by 3DGS [5].

|                       | Grouping<br>Iterations | Dr. Johnson     |                 |                    |                 |                   |                   | Playroom        |                 |                    |                 |                   |                   |
|-----------------------|------------------------|-----------------|-----------------|--------------------|-----------------|-------------------|-------------------|-----------------|-----------------|--------------------|-----------------|-------------------|-------------------|
|                       |                        | PSNR $\uparrow$ | SSIM $\uparrow$ | LPIPS $\downarrow$ | PM $\downarrow$ | Size $\downarrow$ | Time $\downarrow$ | PSNR $\uparrow$ | SSIM $\uparrow$ | LPIPS $\downarrow$ | PM $\downarrow$ | Size $\downarrow$ | Time $\downarrow$ |
| Mip-Splatting*        | –                      | 28.711          | 0.898           | 0.2431             | 10.5            | 981               | 39.3              | 30.005          | 0.907           | 0.2348             | 7.4             | 673               | 30.8              |
| Group Training w/ RS  | 0~15K                  | 27.957          | 0.892           | 0.2526             | 10.1            | 898               | 34.3              | 29.901          | 0.908           | 0.2335             | 8.0             | 749               | 29.1              |
|                       | 0~30K                  | 28.500          | 0.902           | 0.2486             | 10.1            | 902               | 28.2              | 30.283          | 0.914           | 0.2354             | 8.0             | 748               | 24.7              |
| Group Training w/ OPS | 0~15K                  | 29.145          | 0.903           | 0.2393             | 9.4             | 732               | 31.0              | 30.185          | 0.910           | 0.2334             | 6.6             | 520               | 25.2              |
|                       | 0~30K                  | 29.271          | 0.904           | 0.2407             | 9.4             | 734               | 26.0              | 30.305          | 0.911           | 0.2360             | 6.6             | 518               | 22.0              |

Table 8. Comprehensive quantitative evaluation results on the DeepBlending [4] reconstructed by Mip-Splatting [10].

|       |                       | Grouping<br>Iterations | Mip-NeRF360 [1] |         |        |        |          |        |         |         |        |
|-------|-----------------------|------------------------|-----------------|---------|--------|--------|----------|--------|---------|---------|--------|
|       |                       |                        | bicycle         | flowers | garden | stump  | treehill | bonsai | counter | kitchen | room   |
| PSNR  | Mip-Splatting*        | –                      | 25.535          | 21.753  | 27.603 | 26.874 | 22.304   | 32.301 | 29.214  | 31.803  | 31.740 |
|       | Group Training w/ RS  | 0~15K                  | 25.664          | 21.960  | 27.726 | 27.124 | 22.371   | 32.299 | 29.291  | 31.719  | 31.756 |
|       |                       | 0~30K                  | 25.784          | 22.257  | 27.881 | 27.446 | 22.711   | 32.381 | 29.084  | 31.510  | 31.682 |
|       | Group Training w/ OPS | 0~15K                  | 25.651          | 21.852  | 27.825 | 27.166 | 22.411   | 32.745 | 29.330  | 31.870  | 31.721 |
| 0~30K |                       | 25.634                 | 21.844          | 27.858  | 27.145 | 22.441 | 32.653   | 29.255 | 31.864  | 31.856  |        |
| SSIM  | Mip-Splatting*        | –                      | 0.792           | 0.641   | 0.877  | 0.790  | 0.639    | 0.945  | 0.914   | 0.931   | 0.925  |
|       | Group Training w/ RS  | 0~15K                  | 0.800           | 0.653   | 0.881  | 0.805  | 0.647    | 0.949  | 0.917   | 0.932   | 0.926  |
|       |                       | 0~30K                  | 0.803           | 0.656   | 0.882  | 0.816  | 0.658    | 0.947  | 0.914   | 0.931   | 0.925  |
|       | Group Training w/ OPS | 0~15K                  | 0.796           | 0.648   | 0.879  | 0.803  | 0.645    | 0.948  | 0.915   | 0.932   | 0.926  |
| 0~30K |                       | 0.796                  | 0.646           | 0.879   | 0.804  | 0.646  | 0.948    | 0.915  | 0.931   | 0.926   |        |
| LPIPS | Mip-Splatting*        | –                      | 0.1670          | 0.2727  | 0.0950 | 0.1889 | 0.2740   | 0.1881 | 0.1864  | 0.1194  | 0.2011 |
|       | Group Training w/ RS  | 0~15K                  | 0.1607          | 0.2628  | 0.0895 | 0.1736 | 0.2619   | 0.1823 | 0.1807  | 0.1163  | 0.1995 |
|       |                       | 0~30K                  | 0.1708          | 0.2748  | 0.0933 | 0.1751 | 0.2704   | 0.1874 | 0.1891  | 0.1213  | 0.2050 |
|       | Group Training w/ OPS | 0~15K                  | 0.1655          | 0.2657  | 0.0922 | 0.1782 | 0.2683   | 0.1843 | 0.1847  | 0.1185  | 0.2026 |
| 0~30K |                       | 0.1673                 | 0.2710          | 0.0929  | 0.1799 | 0.2723 | 0.1861   | 0.1864 | 0.1200  | 0.2029  |        |
| PM    | Mip-Splatting*        | –                      | 15.6            | 9.5     | 12.3   | 10.9   | 10.1     | 8.4    | 7.4     | 9.2     | 9.7    |
|       | Group Training w/ RS  | 0~15K                  | 19.2            | 12.6    | 17.2   | 15.5   | 13.7     | 9.6    | 8.3     | 9.9     | 10.0   |
|       |                       | 0~30K                  | 19.2            | 12.7    | 17.1   | 15.6   | 13.7     | 9.6    | 8.3     | 9.9     | 10.0   |
|       | Group Training w/ OPS | 0~15K                  | 15.8            | 10.6    | 13.9   | 12.4   | 11.4     | 8.4    | 7.2     | 8.4     | 9.0    |
| 0~30K |                       | 15.7                   | 10.6            | 13.9    | 12.4   | 11.5   | 8.4      | 7.2    | 8.4     | 9.0     |        |
| Size  | Mip-Splatting*        | –                      | 1957            | 1089    | 1475   | 1398   | 1232     | 388    | 364     | 523     | 517    |
|       | Group Training w/ RS  | 0~15K                  | 2494            | 1550    | 2194   | 2083   | 1763     | 560    | 491     | 615     | 558    |
|       |                       | 0~30K                  | 2489            | 1570    | 2187   | 2094   | 1764     | 560    | 490     | 610     | 560    |
|       | Group Training w/ OPS | 0~15K                  | 1968            | 1230    | 1684   | 1564   | 1410     | 379    | 329     | 388     | 403    |
| 0~30K |                       | 1961                   | 1230            | 1684    | 1562   | 1429   | 378      | 329    | 394     | 412     |        |
| Time  | Mip-Splatting*        | –                      | 54.9            | 35.4    | 49.5   | 39.3   | 37.3     | 28.6   | 31.9    | 39.0    | 33.6   |
|       | Group Training w/ RS  | 0~15K                  | 43.7            | 39.9    | 57.7   | 46.3   | 42.1     | 32.2   | 34.1    | 40.3    | 32.8   |
|       |                       | 0~30K                  | 35.1            | 32.5    | 45.3   | 37.0   | 34.2     | 28.8   | 30.0    | 34.2    | 28.9   |
|       | Group Training w/ OPS | 0~15K                  | 47.9            | 34.3    | 47.7   | 37.4   | 36.2     | 27.2   | 28.7    | 32.0    | 28.5   |
| 0~30K |                       | 37.7                   | 28.3            | 38.8    | 30.0   | 29.5   | 24.9     | 26.1   | 28.5    | 25.9    |        |

Table 9. Comprehensive quantitative evaluation results on the Mip-NeRF360 [1] reconstructed by Mip-Splatting [10].

|                       | Grouping<br>Iterations | Train           |                 |                    |                 |                   |                   | Truck           |                 |                    |                 |                   |                   |
|-----------------------|------------------------|-----------------|-----------------|--------------------|-----------------|-------------------|-------------------|-----------------|-----------------|--------------------|-----------------|-------------------|-------------------|
|                       |                        | PSNR $\uparrow$ | SSIM $\uparrow$ | LPIPS $\downarrow$ | PM $\downarrow$ | Size $\downarrow$ | Time $\downarrow$ | PSNR $\uparrow$ | SSIM $\uparrow$ | LPIPS $\downarrow$ | PM $\downarrow$ | Size $\downarrow$ | Time $\downarrow$ |
| Mip-Splatting*        | –                      | 21.783          | 0.826           | 0.1892             | 4.4             | 351               | 19.5              | 25.714          | 0.893           | 0.1232             | 6.8             | 767               | 26.5              |
| Group Training w/ RS  | 0~15K                  | 22.004          | 0.829           | 0.1861             | 4.8             | 405               | 18.9              | 25.901          | 0.896           | 0.1146             | 9.2             | 1123              | 30.3              |
|                       | 0~30K                  | 22.358          | 0.829           | 0.1975             | 4.7             | 403               | 16.3              | 25.934          | 0.896           | 0.1221             | 9.2             | 1119              | 24.4              |
| Group Training w/ OPS | 0~15K                  | 21.994          | 0.830           | 0.1859             | 4.4             | 346               | 17.4              | 25.921          | 0.896           | 0.1178             | 7.5             | 874               | 25.9              |
|                       | 0~30K                  | 22.167          | 0.829           | 0.1915             | 4.4             | 348               | 14.7              | 25.991          | 0.895           | 0.1205             | 7.6             | 876               | 21.1              |

Table 10. Comprehensive quantitative evaluation results on the Tanks&Temples [6] reconstructed by Mip-Splatting [10].

|       |                       | Grouping<br>Iterations | Blender [8] |        |        |        |        |           |        |        |
|-------|-----------------------|------------------------|-------------|--------|--------|--------|--------|-----------|--------|--------|
|       |                       |                        | chair       | drumps | figus  | hotdog | lego   | materials | mic    | ship   |
| PSNR  | Mip-Splatting*        | –                      | 35.773      | 26.357 | 35.890 | 38.267 | 36.354 | 30.645    | 36.934 | 31.738 |
|       | Group Training w/ RS  | 0~15K                  | 36.078      | 26.367 | 35.930 | 38.474 | 36.883 | 30.839    | 37.152 | 31.902 |
|       |                       | 0~30K                  | 35.910      | 26.293 | 35.865 | 38.376 | 36.860 | 30.780    | 36.968 | 31.931 |
|       | Group Training w/ OPS | 0~15K                  | 35.981      | 26.369 | 35.912 | 38.396 | 36.748 | 30.756    | 37.067 | 31.823 |
| 0~30K |                       | 35.958                 | 26.363      | 35.914 | 38.326 | 36.739 | 30.704 | 37.049    | 31.824 |        |
| SSIM  | Mip-Splatting*        | –                      | 0.988       | 0.956  | 0.988  | 0.986  | 0.984  | 0.961     | 0.993  | 0.907  |
|       | Group Training w/ RS  | 0~15K                  | 0.989       | 0.956  | 0.988  | 0.987  | 0.986  | 0.963     | 0.993  | 0.909  |
|       |                       | 0~30K                  | 0.989       | 0.957  | 0.988  | 0.987  | 0.986  | 0.964     | 0.993  | 0.911  |
|       | Group Training w/ OPS | 0~15K                  | 0.989       | 0.956  | 0.988  | 0.987  | 0.985  | 0.963     | 0.993  | 0.909  |
| 0~30K |                       | 0.989                  | 0.956       | 0.988  | 0.987  | 0.985  | 0.963  | 0.993     | 0.909  |        |
| LPIPS | Mip-Splatting*        | –                      | 0.0109      | 0.0366 | 0.0111 | 0.0186 | 0.0150 | 0.0359    | 0.0062 | 0.1022 |
|       | Group Training w/ RS  | 0~15K                  | 0.0101      | 0.0355 | 0.0110 | 0.0163 | 0.0126 | 0.0330    | 0.0059 | 0.0980 |
|       |                       | 0~30K                  | 0.0110      | 0.0358 | 0.0111 | 0.0173 | 0.0132 | 0.0341    | 0.0060 | 0.0998 |
|       | Group Training w/ OPS | 0~15K                  | 0.0105      | 0.0360 | 0.0111 | 0.0169 | 0.0133 | 0.0343    | 0.0060 | 0.0997 |
| 0~30K |                       | 0.0105                 | 0.0359      | 0.0111 | 0.0171 | 0.0134 | 0.0349 | 0.0061    | 0.1001 |        |
| PM    | Mip-Splatting*        | –                      | 3.0         | 3.0    | 2.7    | 2.7    | 2.9    | 2.6       | 2.8    | 2.9    |
|       | Group Training w/ RS  | 0~15K                  | 3.3         | 3.3    | 2.9    | 2.9    | 3.3    | 2.8       | 3.0    | 3.4    |
|       |                       | 0~30K                  | 3.3         | 3.4    | 2.9    | 2.9    | 3.3    | 2.8       | 3.0    | 3.4    |
|       | Group Training w/ OPS | 0~15K                  | 3.1         | 3.1    | 2.7    | 2.7    | 3.1    | 2.7       | 2.9    | 3.1    |
| 0~30K |                       | 3.1                    | 3.1         | 2.7    | 2.7    | 3.1    | 2.7    | 2.9       | 3.1    |        |
| Size  | Mip-Splatting*        | –                      | 90          | 98     | 51     | 51     | 76     | 40        | 64     | 83     |
|       | Group Training w/ RS  | 0~15K                  | 141         | 146    | 79     | 70     | 136    | 71        | 94     | 146    |
|       |                       | 0~30K                  | 141         | 147    | 80     | 71     | 136    | 71        | 94     | 146    |
|       | Group Training w/ OPS | 0~15K                  | 109         | 115    | 57     | 55     | 98     | 51        | 72     | 109    |
| 0~30K |                       | 109                    | 115         | 57     | 55     | 99     | 51     | 72        | 109    |        |
| Time  | Mip-Splatting*        | –                      | 9.2         | 8.8    | 6.2    | 8.4    | 8.8    | 6.2       | 9.3    | 10.7   |
|       | Group Training w/ RS  | 0~15K                  | 9.6         | 9.7    | 6.9    | 8.8    | 9.8    | 7.3       | 9.8    | 12.1   |
|       |                       | 0~30K                  | 8.5         | 8.7    | 6.4    | 8.1    | 8.8    | 6.9       | 8.5    | 10.8   |
|       | Group Training w/ OPS | 0~15K                  | 8.6         | 8.8    | 6.2    | 7.8    | 8.6    | 6.6       | 8.4    | 10.4   |
| 0~30K |                       | 7.8                    | 8.0         | 6.0    | 7.3    | 7.7    | 6.3    | 7.6       | 9.6    |        |

Table 11. Comprehensive quantitative evaluation results on the Blender [8] reconstructed by Mip-Splatting [10].
